# Supplementary material for: Physical Properties and Polymorphism of Acrylic Acid-Grafted Poly(1,4-butylene adipate-co-terephthalate)/Organically Modified Layered Double Hydroxide Nanocomposites
Source: MDPI journal article supplement (doi:10.3390/polym14030492), 2022-01-26
Supplement: s1 [file s1]

## Supplementary information

# Physical Properties and Polymorphism of Acrylic Acid-Grafted Poly(1,4-butylene adipate-co-terephthalate)/Organically Modified Layered Double Hydroxide Nanocomposites

Yun-Ju Chen, Yu-Jia Hung, Ming-Yen Chiang, En-Tze Wang and Tzong-Ming Wu \*

Department of Materials Science and Engineering, National Chung Hsing University, 250 Kuo Kuang Road, Taichung 402, Taiwan;  
bitcoin2243@gmail.com (Y.-J.C.); tvickytw@yahoo.com.tw (Y.-J.H.);  
tigercity86@gmail.com (M.-Y.C.); axsz2760089@gmail.com (E.-T.W.)  
\* Correspondence: tmwu@dragon.nchu.edu.tw; Tel.: +886-4-22840500 (ext. 806)

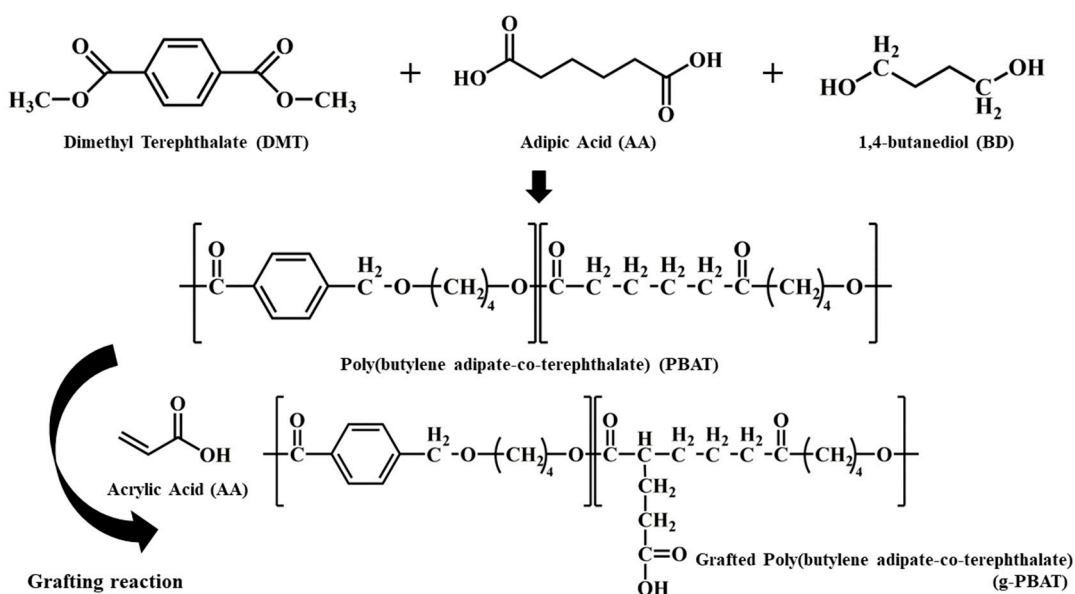

Figure S1: The synthesis procedure of g-PBAT.

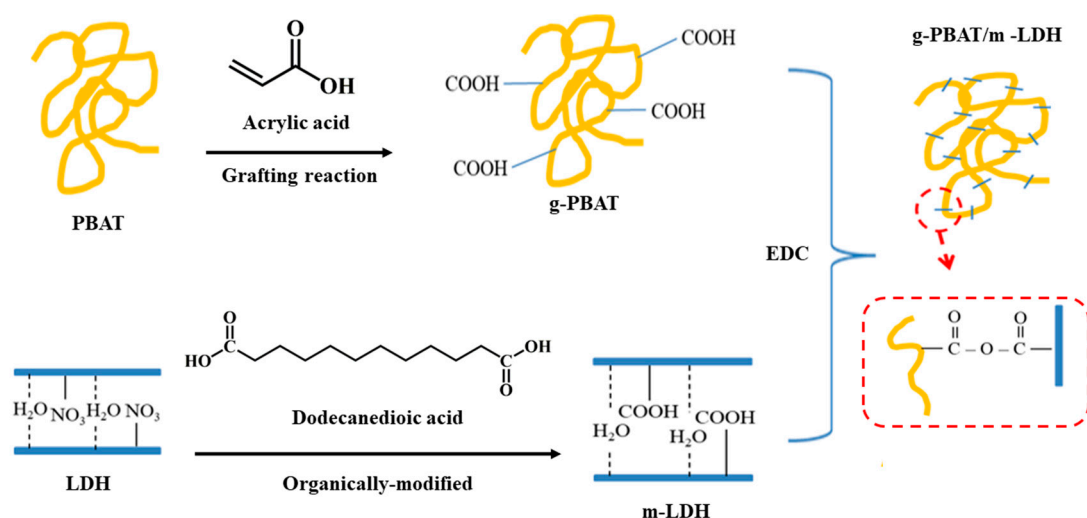

Figure S2: The synthesis procedure of g-PBAT/m-LDH nanocomposites.

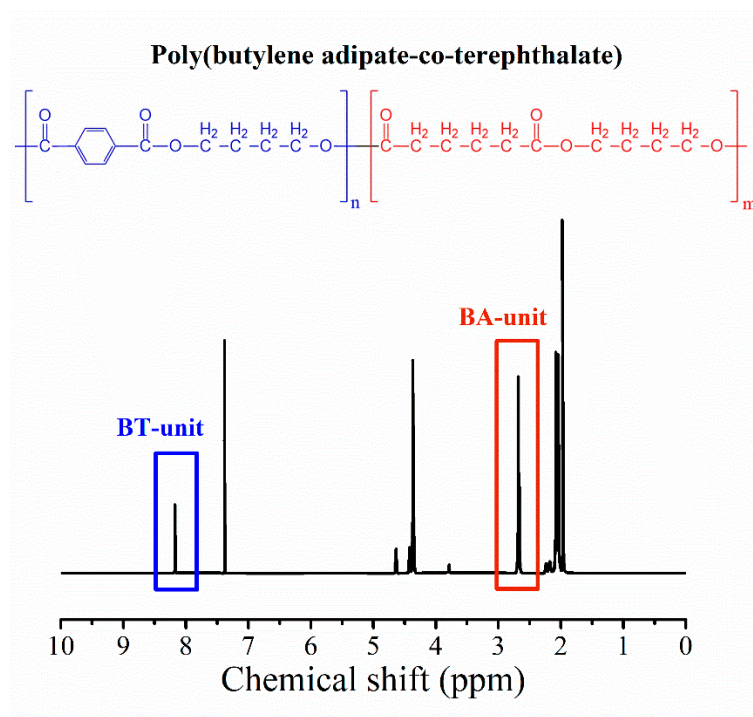

Figure S3:  $^1\text{H}$ -NMR spectrum of the PBAT-90 copolymer.

The detailed procedure of crystal form determination is listed as following: The diffraction peaks of PBT should be observed at  $2\theta = 16.3^\circ$ ,  $17.4^\circ$ ,  $20.6^\circ$ ,  $23.3^\circ$ , and  $25.3^\circ$ . No diffraction peaks were observed at  $2\theta = 20.6^\circ$ ,  $23.3^\circ$ , and  $25.3^\circ$  as shown in Figure 1a. The diffraction peaks observed in Figure 1a were at  $2\theta = 21.8^\circ$ ,  $22.5^\circ$  and  $24.1^\circ$ , which were attributed to  $\beta$ -crystal of PBA.
